# Supplementary material for: Impact of curcumin delivery system format on bioaccessibility: nanocrystals, nanoemulsion droplets, and natural oil bodies
Source: Royal Society of Chemistry journal article supplement (doi:10.1039/c8fo02510j), 2019-01-01
Supplement: c8fo02510j1.pdf [file c8fo02510j1.pdf]

## Supplemental Information

**Fig. S1**

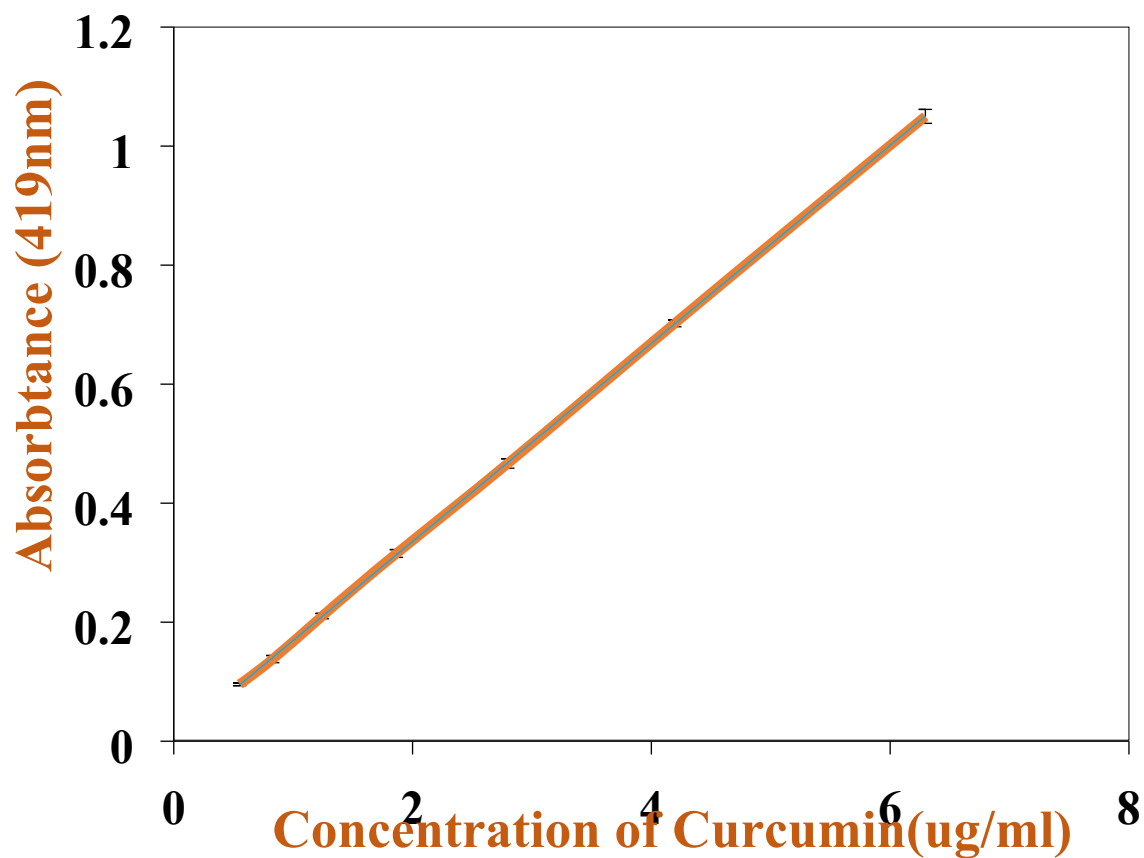

**Figure S1.** Calibration curve used to determine the concentration of the curcumin in the samples by a UV-visible spectrometry method.

Fig. S2

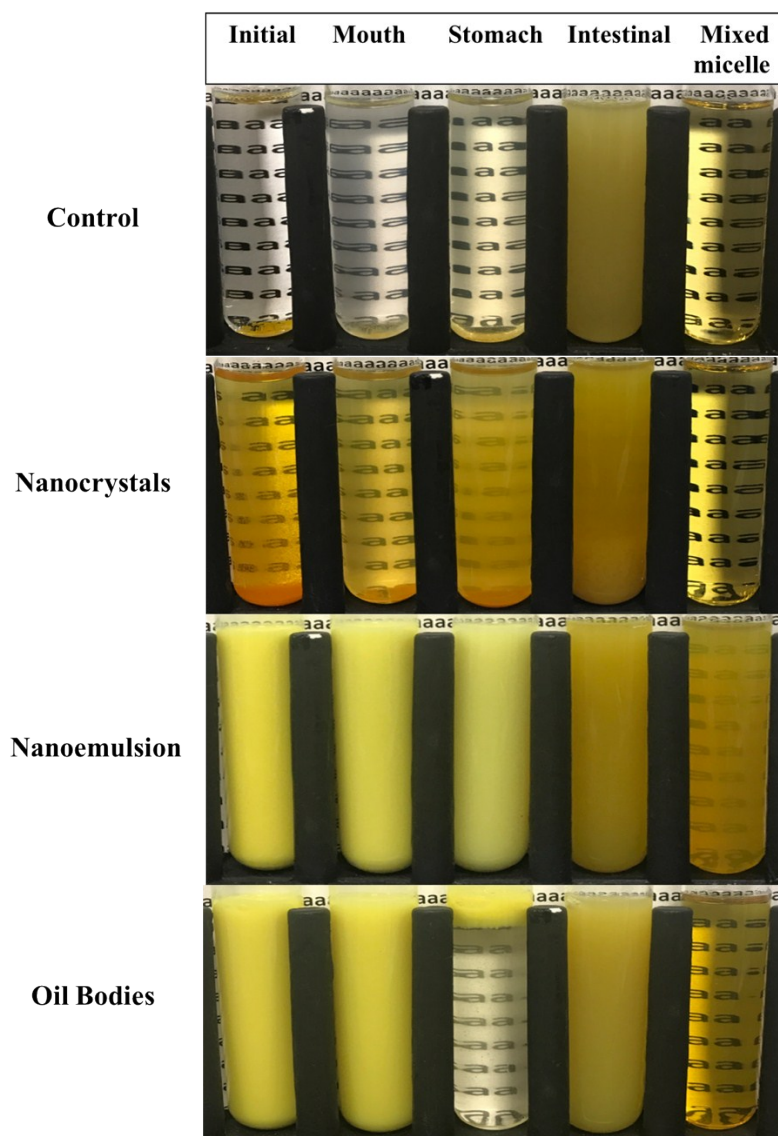

**Figure S2.** Photographs of the different samples after exposure to different regions of the simulated GIT model.
